# Supplementary material for: State of deworming coverage and equity in low-income and middle-income countries using household health surveys: a spatiotemporal cross-sectional study
Source: PubMed Central journal article supplement (PMC7024997; doi:10.1016/s2214-109x(19)30413-9), 2019-09-23
Supplement: mmc1.pdf [file mmc1.pdf]

# THE LANCET

## Global Health

### Supplementary appendix

This appendix formed part of the original submission and has been peer reviewed. We post it as supplied by the authors.

Supplement to: C Lo NC, Heft-Neal S, Coulibaly JT, Leonard L, Bendavid E, Addiss DG. State of deworming coverage and equity in low-income and middle-income countries using household health surveys: a spatiotemporal cross-sectional study. *Lancet Glob Health* 2019; published online Sept 23. [https://doi.org/10.1016/S2214-109X\(19\)30413-9](https://doi.org/10.1016/S2214-109X(19)30413-9).

## **Supplemental Materials**

Lo NC, Heft-Neal S, Coulibaly JT, Leonard L, Bendavid E, and Addiss DG. State of deworming coverage and equity in low-income and middle-income countries using household health surveys: a spatiotemporal cross-sectional study. *Lancet Global Health* (2019).

## **Contents**

|                                                 |        |
|-------------------------------------------------|--------|
| Section 1: Technical appendix.....              | Page 3 |
| Section 2: Supplemental figures and tables..... | Page 7 |

## Section 1: Technical appendix

In this technical appendix, we provide further description of data processing of the Demographic and Health Surveys (DHS) and statistical analysis for the study.

### Selection of DHS surveys

We included all DHS surveys with data on deworming receipt in pre-school children (variable h43), as proxy-reported by the mother (see Methods). The survey question was formulated as whether the child received “drugs for intestinal parasites in the 6 months prior to the survey”.

We excluded DHS surveys from countries non-endemic for soil-transmitted helminthiasis (STH) or with low STH prevalence where mass deworming would not be recommended per WHO guidelines.<sup>1</sup> For STH-endemic study countries, we further excluded data on a sub-national basis in regions (administrative level one) due to low STH prevalence in majority of geographic zone where deworming would not be recommended per WHO guidelines. The exclusion process was determined using the WHO preventive chemotherapy and transmission control databank, recent STH mapping data from the Expanded Special Project for Elimination of NTDs (ESPEN), and other sources, and, in some cases, correspondence with national NTD program managers or WHO NTD focal points when these data sources were insufficient.<sup>2,3</sup> We excluded data in STH-endemic countries on a sub-national basis using the process outlined below:

1. For all countries in sub-Saharan Africa, we used the ESPEN database when available,<sup>3</sup> which included results of recent neglected tropical disease (NTD) mapping at the district level. We excluded all districts that were indicated in green as “non-endemic,” i.e., <1% STH prevalence.
2. For all countries not included in the ESPEN database, we used the WHO preventive chemotherapy (PCT) databank<sup>2</sup> and UN Population and Vital Statistics Report to estimate the proportion of pre-school age children (ages 1-4 years) eligible for deworming, defined as:  
$$a = \frac{Pop_{PCT,preschool}}{Pop_{preschool}}$$
For countries ( $a > 0.90$ ), we considered the entire country to be endemic; for countries ( $a < 0.90$ ), see step 3. The threshold of 0.90 was selected to be approximating 100% of the country within the margin of expected measurement error between datasets.
3. For countries ( $a < 0.90$ ), we repeated the process in Step 1 using the school-age children (ages 5-14 years) population, where  $b = \frac{Pop_{PCT,schoolage}}{Pop_{schoolage}}$ . As data reporting has been historically more developed for this age population and risks are comparable between the age groups, this step was included to avoid removal of data from endemic countries due to poor quality reporting. For countries ( $b > 0.90$ ), we considered the entire country to be endemic; for countries ( $b < 0.90$ ), see step 4.
4. For countries ( $a < 0.90$ ) and ( $b < 0.90$ ), we consulted available STH endemicity maps to exclude non-endemic or low prevalence geographic zones of endemic countries on a sub-national basis. We used available data from NTD Mapper, Global NTD database, GAHI, and

peer-reviewed literature. Where questions remained, we contacted other sources, including: WHO, NTD contacts in WHO regional offices, national STH program managers, Children Without Worms, and the NTD Supply Chain Forum database to make final decisions.

5. For sub-national geographic zones (DHS regions) with majority (defined as >50%) of area considered endemic, these were included in the analysis. Otherwise, these regions were excluded.

The process for inclusion and exclusion of DHS data was defined prior to the analysis being conducted. Table A1 includes DHS survey data excluded from the analysis.

**Table A1: DHS surveys excluded from study**

| Country    | Survey years | Comments                                                          | Source           |
|------------|--------------|-------------------------------------------------------------------|------------------|
| Albania    | 2008         | Not in PCT Databank                                               | WHO PCT Databank |
| Armenia    | 2010         | Low endemicity; mapping data inadequate to include specific areas | WHO              |
| Bolivia    | 2008         | Mapping data inadequate to include specific areas                 | WHO              |
| Egypt      | 2014         | “No PC required”                                                  | WHO PCT Databank |
| Kyrgyzstan | 2012         | Mapping data inadequate; low endemicity                           | WHO              |
| Maldives   | 2009         | ”No PC required”                                                  | WHO PCT Databank |
| Tajikistan | 2012         | Low endemicity; mapping data inadequate to include specific areas | WHO              |

STH, soil-transmitted helminthiasis; PCT, preventive chemotherapy and transmission control

**Table A2: Countries with non-endemic regions excluded from study**

| Country                      | Survey years | Comments          | Source                        |
|------------------------------|--------------|-------------------|-------------------------------|
| Chad                         | 2014         | Partially endemic | ESPEN                         |
| Democratic Republic of Congo | 2007, 2013   | Partially endemic | ESPEN                         |
| Ethiopia                     | 2010, 2016   | Partially endemic | ESPEN                         |
| Gambia                       | 2013         | Partially endemic | ESPEN                         |
| Kenya                        | 2008, 2014   | Partially endemic | ESPEN                         |
| Madagascar                   | 2008         | Partially endemic | ESPEN                         |
| Namibia                      | 2006, 2013   | Partially endemic | ESPEN                         |
| Nigeria                      | 2008, 2013   | Partially endemic | ESPEN                         |
| Pakistan                     | 2012-13      | Partially endemic | WHO; unpublished mapping data |
| Peru                         | 2004         | Partially endemic | WHO; published literature     |
| Senegal                      | 2010         | Partially endemic | ESPEN                         |
| Swaziland                    | 2006         | Partially endemic | ESPEN                         |
| Tanzania                     | 2010, 2015   | Partially endemic | ESPEN                         |
| Yemen                        | 2013         | Partially endemic | WHO; unpublished mapping data |
| Zimbabwe                     | 2010, 2015   | Partially endemic | ESPEN                         |

### Statistical analysis

We estimated the proportion of variance in equity index explained by within-country compared to between-country variation to understand whether equity was driven more by national policy or within country differences. To estimate the proportion of variation explained between country differences, we performed a logistic regression with deworming variable as the independent variable and country indicator variables as the dependent variables and estimated the  $R^2$  value; the remainder of this  $R^2$  value were attributable to within country differences as the between country differences were accounted for with the indicator variables. We used bootstrapping to generate 95% confidence intervals.

We used a local smoothed regression to qualitatively summarize the relationship between regional deworming coverage and equity index, and also examined the relationship of discrete changes in coverage and equity over time. We compared national deworming coverage estimates reported to WHO and estimated by DHS in study countries, and estimated the number of countries that reported to WHO a national deworming coverage of >75% in pre-school children.

For construction of 95% confidence intervals (95% CI) for deworming, we computed standard errors for a binomial proportion using the DHS survey weights. For the global estimate, we weighted this standard error by population size of each country.

### Missing data

The DHS surveys included in the study are shown in Table 1 of the main text, and the process for survey inclusion and exclusion is described in the Methods and in the technical appendix as above. The key study variable was the proxy-reported survey question on receipt of deworming in pre-school children. We included observations marked “yes” and “no”, and excluded observations for this variable that were missing or marked as “don’t know,” “not reported,” etc. In the predictors of deworming analysis, we only included children with complete observation record for deworming receipt variable and defined predictors. In sensitivity analysis, we repeated the analysis with larger sample size by omitting variables with higher proportion of missing data, including receipt of vitamin A, DPT3, and maternal education.

### Analytic code

We used R software (R Foundation for Statistical Computing; Vienna, Austria). The authors fully support the importance of data sharing and transparency in research, and analytic code are available on request to the corresponding author. All data files are available from the DHS database online.

### Additional results and discussion

When considering healthcare access, we found that of the 67% (SE: 0.04%) of pre-school children who completed their DTP3 vaccine, only 38% (SE: 0.05%) of these children had received deworming in the previous 6 months; deworming coverage was estimated at 19% (SE: 0.06%) for children who did not receive their DTP3 vaccine (third dose). Similarly, of the 58% (SE: 0.04%) of pre-school children who had received vitamin A supplementation in the previous 6 months, 47% (SE: 0.06%) of these children had also been dewormed. We estimated 82% of children dewormed during the previous 6 months also were reported to have received vitamin A supplements.

These results identify the potential to integrate deworming efforts with other interventions (e.g. vitamin A) that have achieved high coverage where deworming coverage is persistently inequitable or low.

### **References**

1. WHO. Helminth control in school-age children: a guide for managers of control programmes: Geneva: World Health Organization 2011.
2. WHO Neglected tropical diseases: PCT databank (Soil-transmitted helminthiases). [http://www.who.int/neglected\\_diseases/preventive\\_chemotherapy/lf/en/](http://www.who.int/neglected_diseases/preventive_chemotherapy/lf/en/) (accessed 12/24/18).
3. WHO AFRO: Expanded Special Project for Elimination of Neglected Tropical Diseases (ESPEN). 2018. <http://espen.afro.who.int> (accessed 12/24/18).

## **Section 2: Supplemental Figures and Tables**

Table S1: Trends in equity by study country over time

Table S2: Study countries and national deworming coverage in pre-school children reported to WHO and estimated by DHS

Table S3: Variables in regression model on predictors of deworming receipt

Table S4: Regression model estimating the ecological correlates of deworming equity in pre-school age children

Table S5: Correlates of maternal-reported deworming in pre-school age children for subset of covariates with limited missing data

Table S6: Correlates of maternal-reported deworming in pre-school age children in sub-Saharan Africa

Table S7: Regression model estimating the ecological correlates of deworming equity in pre-school age children in Sub-Saharan Africa

Table S8: Correlates of maternal-reported deworming in pre-school age children with region level fixed effects



**Table S1: Trends in equity by study country over time**

| <b>Study country</b>      | <b>Survey year</b> | <b>Equity trend<sup>a</sup></b> |
|---------------------------|--------------------|---------------------------------|
| <b>Cambodia</b>           | 2005, 2010, 2014   | <b>Improved</b>                 |
| <b>DR Congo</b>           | 2007, 2013         | <b>Improved</b>                 |
| <b>Lesotho</b>            | 2009, 2014         | <b>Improved</b>                 |
| <b>Liberia</b>            | 2007, 2013         | <b>Improved</b>                 |
| <b>Namibia</b>            | 2006, 2013         | <b>Improved</b>                 |
| <b>Timor-Leste</b>        | 2009, 2016         | <b>Improved</b>                 |
| <b>Uganda</b>             | 2006, 2011, 2016   | <b>Improved</b>                 |
| <b>Zimbabwe</b>           | 2010, 2015         | <b>Improved</b>                 |
| <b>Burundi</b>            | 2010, 2016         | <b>Unchanged</b>                |
| <b>Dominican Republic</b> | 2007, 2013         | <b>Unchanged</b>                |
| <b>Ghana</b>              | 2008, 2014         | <b>Unchanged</b>                |
| <b>Kenya</b>              | 2008, 2014         | <b>Unchanged</b>                |
| <b>Malawi</b>             | 2010, 2015         | <b>Unchanged</b>                |
| <b>Nepal</b>              | 2006, 2011, 2016   | <b>Unchanged</b>                |
| <b>Nigeria</b>            | 2008, 2013         | <b>Unchanged</b>                |
| <b>Philippines</b>        | 2008, 2017         | <b>Unchanged</b>                |
| <b>Rwanda</b>             | 2008, 2010, 2014   | <b>Unchanged</b>                |
| <b>Tanzania</b>           | 2010, 2015         | <b>Unchanged</b>                |
| <b>Bangladesh</b>         | 2011, 2014         | <b>Worsened</b>                 |
| <b>Ethiopia</b>           | 2010, 2016         | <b>Worsened</b>                 |
| <b>Haiti</b>              | 2006, 2012, 2016   | <b>Worsened</b>                 |
| <b>Zambia</b>             | 2007, 2013         | <b>Worsened</b>                 |

<sup>a</sup>Equity trend designation is based on qualitative data interpretation; changes in equity trend are observed with change in mean equity index and/or height of bar (variation in equity within country).

**Table S2: Study countries and national deworming coverage in pre-school children reported to WHO and estimated by DHS**

| Study country         | Survey year | WHO national coverage | DHS national coverage | Study country                       | Survey year | WHO national coverage | DHS national coverage |
|-----------------------|-------------|-----------------------|-----------------------|-------------------------------------|-------------|-----------------------|-----------------------|
| <b>Africa Region</b>  |             |                       |                       | <b>Africa Region</b>                |             |                       |                       |
| Benin                 | 2012        | 100**                 | 47.2                  | Tanzania                            | 2015        | 100                   | 34.4                  |
| Burkina Faso          | 2010        | -                     | 12.2                  | Togo                                | 2013        | 100                   | 45.5                  |
| Burundi               | 2016        | 94.0                  | 61.4                  | Uganda                              | 2016        | 59.7                  | 56.1                  |
| Cameroon              | 2011        | 100                   | 47.7                  | Zambia                              | 2013        | 97.5                  | 55.7                  |
| Chad                  | 2014        | 100                   | 28.5                  | Zimbabwe                            | 2015        | 25.6                  | 18.9                  |
| Comoros               | 2012        | 100*                  | 52.8                  |                                     |             |                       |                       |
| Côte d'Ivoire         | 2012        | 100**                 | 35.1                  | <b>Americas Region</b>              |             |                       |                       |
| DR Congo              | 2013        | 57.9                  | 56.6                  | Dominican Republic                  | 2013        | 33.6                  | 48.5                  |
| Ethiopia              | 2016        | 72.3*                 | 12.3                  | Guyana                              | 2009        | 77.3                  | 48.8                  |
| Gabon                 | 2012        | 100                   | 68.5                  | Haiti                               | 2016        | 74.6                  | 14.4                  |
| Gambia                | 2013        | 100                   | 34.1                  | Honduras                            | 2011        | 26.6                  | 49.5                  |
| Ghana                 | 2014        | -                     | 34.9                  | Peru                                | 2004        | -                     | 29.8                  |
| Guinea                | 2012        | 100*                  | 26.1                  | <b>South-East Asia Region</b>       |             |                       |                       |
| Kenya                 | 2014        | 42.0                  | 39.8                  | Bangladesh                          | 2014        | 1.9                   | 36.6                  |
| Lesotho               | 2014        | -                     | 21.0                  | India                               | 2015        | 67.6                  | 30.7                  |
| Liberia               | 2013        | 100                   | 52.7                  | Myanmar                             | 2015        | 95.5                  | 38.7                  |
| Madagascar            | 2008        | 100                   | 63.6                  | Nepal                               | 2016        | 86.5                  | 60.7                  |
| Malawi                | 2015        | 83.1*                 | 41.5                  | Timor-Leste                         | 2016        | 100                   | 44.4                  |
| Mali                  | 2012        | 50.0**                | 29.6                  | <b>European Region</b>              |             |                       |                       |
| Mozambique            | 2011        | 100                   | 42.0                  | Azerbaijan                          | 2006        | 2.9*                  | 5.0                   |
| Namibia               | 2013        | 89.6                  | 44.9                  | <b>Eastern Mediterranean Region</b> |             |                       |                       |
| Niger                 | 2012        | 100                   | 25.0                  | Pakistan                            | 2012        | 92.2*                 | 24.9                  |
| Nigeria               | 2013        | 36.6                  | 18.7                  | Yemen                               | 2013        | -                     | 10.4                  |
| Republic of the Congo | 2011        | 100*                  | 69.8                  | <b>Western Pacific Region</b>       |             |                       |                       |
| Rwanda                | 2014        | 100                   | 73.5                  | Cambodia                            | 2014        | 96.2                  | 53.7                  |
| Sao Tome and Principe | 2008        | 24.9**                | 50.1                  | Philippines                         | 2017        | 80.8                  | 39.5                  |
| Senegal               | 2010        | 100                   | 50.5                  |                                     |             |                       |                       |
| Sierra Leone          | 2013        | 100                   | 53.8                  |                                     |             |                       |                       |
| South Africa          | 2016        | 100                   | 61.1                  |                                     |             |                       |                       |
| Swaziland             | 2006        | 100                   | 43.4                  |                                     |             |                       |                       |

WHO national coverage data for deworming in pre-school children was obtained from the WHO preventive chemotherapy databank, which was reported as the proportion of the population requiring preventive chemotherapy for STH in the country that have been treated. We obtained WHO data corresponding to the year of the most recent DHS survey, or the most recent available data within one year of DHS survey (indicated by \*) or within two years (indicated by \*\*). When two coverage estimates were provided in the WHO databank for national coverage in a given year, we used the higher value. When data were available for both earlier and later years, an average was taken to estimate coverage in the survey year. DHS national coverage was estimated directly from survey data as described in the Methods.

**Table S3: Variables in regression model on predictors of deworming receipt**

| <b>Variable</b>                                                           | <b>Category</b> | <b>Variable</b>                                                           |
|---------------------------------------------------------------------------|-----------------|---------------------------------------------------------------------------|
| Child's age                                                               | Demographic     | Categorical                                                               |
| Child's gender                                                            | Demographic     | Binary                                                                    |
| Wealth quintile                                                           | Socioeconomic   | Continuous                                                                |
| Residence                                                                 | Demographic     | Binary (rural/urban)                                                      |
| Mother's age                                                              | Demographic     | Binary (<30 years)                                                        |
| Mother's education                                                        | Socioeconomic   | Categorical; 3-categories<br>(None, any up to primary,<br>beyond primary) |
| Improved water access                                                     | Socioeconomic   | Binary                                                                    |
| Improved toilet access                                                    | Socioeconomic   | Binary                                                                    |
| Received 3 <sup>rd</sup> dose<br>diphtheria-pertussis-<br>tetanus vaccine | Healthcare      | Binary                                                                    |
| Vitamin A in past 6<br>months                                             | Healthcare      | Binary                                                                    |

**Table S4: Regression model estimating the ecological correlates of deworming equity in pre-school age children**

| <b>Variable</b>                                | <b>Coefficient</b> | <b>95% CI</b>      |
|------------------------------------------------|--------------------|--------------------|
| Age (year)                                     | <b>0.09</b>        | <b>(0.02,0.15)</b> |
| Gender (female)                                | -0.1               | (-0.31,0.10)       |
| Wealth quintile                                | <b>0.01</b>        | <b>(0.00,0.02)</b> |
| Mother's age (<30 years)                       | -0.03              | (-0.11,0.05)       |
| Rural residence                                | 0.03               | (-0.02,0.08)       |
| Mother's education (tertile)                   | <b>0.03</b>        | <b>(0.01,0.06)</b> |
| Improved drinking water                        | 0.04               | (-0.01,0.1)        |
| Improved toilet facility                       | 0.02               | (-0.04,0.07)       |
| Receipt of 3 <sup>rd</sup> dose of DPT vaccine | <b>0.08</b>        | <b>(0.00,0.17)</b> |
| Receipt of vitamin A supplementation           | <b>0.15</b>        | <b>(0.09,0.22)</b> |

Bolded findings indicate a relationship with a  $p < 0.05$ . The coefficient refers to absolute change in equity index associated with one unit change in the variable.

**Table S5: Correlates of maternal-reported deworming in pre-school age children for subset of covariates with limited missing data**

| <b>Variable</b>          | <b>Adjusted<br/>marginal effects</b> | <b>95% CI</b>       |
|--------------------------|--------------------------------------|---------------------|
| Age (year)               | <b>7·7</b>                           | <b>( 5·2, 10·2)</b> |
| Sex (female)             | <b>-0·4</b>                          | <b>(-0·6, -0·3)</b> |
| Wealth quintile          | <b>3·3</b>                           | <b>( 2·3, 4·3)</b>  |
| Mother's age (<30 years) | -0·3                                 | (-1·4, 0·8)         |
| Rural residence          | 1·2                                  | (-0·1, 2·5)         |
| Improved drinking water  | <b>1·7</b>                           | <b>(0·5, 2·9)</b>   |
| Improved toilet facility | 1·4                                  | (-0·4, 3·2)         |

Bolded findings indicate a relationship with a  $p < 0.05$ . Marginal effects refer to absolute change in mean deworming coverage associated with one unit change in variable. Robust standard errors clustered by country and survey. Coefficients in Table S5 are estimated the same as in Table 3 in the main text but without mother's education, vitamin A, and 3<sup>rd</sup> dose of DTP, each of which have missing values in the data.

**Table S6: Correlates of maternal-reported deworming in pre-school age children in sub-Saharan Africa**

| <b>Variable</b>                     | <b>Adjusted<br/>marginal effects</b> | <b>95% CI</b>       |
|-------------------------------------|--------------------------------------|---------------------|
| Age (year)                          | <b>7·8</b>                           | <b>(6·2, 9·5)</b>   |
| Sex (female)                        | -0·5                                 | (-0·9, 0·0)         |
| Wealth quintile                     | <b>2·0</b>                           | <b>(0·9, 3·2)</b>   |
| Mother's age (<30 years)            | <b>-1·3</b>                          | <b>(-2·0, -0·6)</b> |
| Rural residence                     | 0·6                                  | (-0·9, 2·1)         |
| Mother's education (tertile)        | <b>4·3</b>                           | <b>(2·8, 5·8)</b>   |
| Improved drinking water             | 1·3                                  | (-0·1, 2·7)         |
| Improved toilet facility            | 1·2                                  | (-0·2, 2·6)         |
| 3 <sup>rd</sup> dose of DTP vaccine | <b>13·3</b>                          | <b>(11·5, 15·0)</b> |
| Vitamin A                           | <b>35·8</b>                          | <b>(31·8, 39·9)</b> |

Bolded findings indicate a relationship with a  $p < 0.05$ . Marginal effects refer to absolute change in mean deworming coverage associated with one unit change in variable. Robust standard errors clustered by country and survey. See Methods for statistical specifications. DTP; diphtheria, tetanus, and pertussis

**Table S7: Regression model estimating the ecological correlates of deworming equity in pre-school age children in Sub-Saharan Africa**

| <b>Variable</b>                                | <b>Coefficient</b> | <b>95% CI</b>      |
|------------------------------------------------|--------------------|--------------------|
| Age (year)                                     | 0.06               | (-0.04,0.16)       |
| Gender (female)                                | 0.03               | (-0.20,0.26)       |
| Wealth quintile                                | <b>0.03</b>        | <b>(0.01,0.04)</b> |
| Mother's age (<30 years)                       | 0.06               | (-0.02,0.15)       |
| Rural residence                                | <b>0.07</b>        | <b>(0.02,0.11)</b> |
| Mother's education (tertile)                   | 0.02               | (-0.02,0.06)       |
| Improved drinking water                        | 0.04               | (-0.03,0.1)        |
| Improved toilet facility                       | -0.02              | (-0.09,0.05)       |
| Receipt of 3 <sup>rd</sup> dose of DPT vaccine | 0.08               | (-0.03,0.19)       |
| Receipt of vitamin A supplementation           | <b>0.16</b>        | <b>(0.07,0.24)</b> |

Bolded findings indicate a relationship with a  $p < 0.05$ . The coefficient refers to absolute change in equity index associated with one unit change in the variable.

**Table S8: Correlates of maternal-reported deworming in pre-school age children with region level fixed effects**

| <b>Variable</b>                     | <b>Adjusted marginal effects</b> | <b>95% CI</b>      |
|-------------------------------------|----------------------------------|--------------------|
| Age (year)                          | <b>7.4</b>                       | <b>(6.2, 8.5)</b>  |
| Sex (female)                        | -0.3                             | (-1.5, 0.9)        |
| Wealth quintile                     | -1.5                             | (-3.1, 0.2)        |
| Mother's age (<30 years)            | -1.4                             | (-3.5, 0.6)        |
| Rural residence                     | <b>13.9</b>                      | <b>(6.2,21.7)</b>  |
| Mother's education (tertile)        | <b>13.5</b>                      | <b>(11.1,15.9)</b> |
| Improved drinking water             | -1.7                             | (-5.9, 2.5)        |
| Improved toilet facility            | -3                               | (-7.9, 1.9)        |
| 3 <sup>rd</sup> dose of DTP vaccine | <b>7.7</b>                       | <b>(5.7, 9.6)</b>  |
| Vitamin A                           | <b>35.1</b>                      | <b>(31.6,38.6)</b> |

Bolded findings indicate a relationship with a  $p < 0.05$ . Marginal effects refer to absolute change in mean deworming coverage associated with one unit change in variable. Robust standard errors clustered by country and survey. See Methods for statistical specifications. DTP; diphtheria, tetanus, and pertussis
